# Supplementary material for: Molecular Detection of Candidatus Scalindua pacifica and Environmental Responses of Sediment Anammox Bacterial Community in the Bohai Sea, China
Source: PubMed Central journal article supplement (PMC3620062; doi:10.1371/journal.pone.0061330), 2013-04-08
Supplement: pone.0061330.s009.pdf [file pone.0061330.s009.pdf]

**Table S1.** Measurements of *in situ* environmental parameters of the 14 sampling stations in the Bohai Sea.

| Environmental factor                                           | Station |        |        |        |        |        |        |        |        |        |        |        |        |        |
|----------------------------------------------------------------|---------|--------|--------|--------|--------|--------|--------|--------|--------|--------|--------|--------|--------|--------|
|                                                                | B1      | B3     | B5     | B7     | B8     | B10    | B11    | B12    | B14    | B15    | B16    | B19    | B20    | B22    |
| <b>Longitude (°E)</b>                                          | 121.50  | 121.03 | 120.70 | 120.01 | 120.65 | 118.43 | 119.48 | 120.28 | 118.92 | 119.17 | 120.00 | 119.65 | 119.90 | 119.64 |
| <b>Latitude (°N)</b>                                           | 40.43   | 40.00  | 39.67  | 39.00  | 38.89  | 38.45  | 38.43  | 38.36  | 38.23  | 38.30  | 38.02  | 37.92  | 37.91  | 37.96  |
| <b>Water depth (m)</b>                                         | 13.72   | 29.96  | 30.26  | 20.60  | 37.91  | 17.90  | 23.88  | 28.20  | 16.91  | 19.89  | 18.30  | 17.10  | 17.40  | 17.30  |
| <b>Surface water (at 1.0 m depth)</b>                          |         |        |        |        |        |        |        |        |        |        |        |        |        |        |
| Temperature (°C)                                               | 24.89   | 24.37  | 24.72  | 24.82  | 22.73  | 25.43  | 25.30  | 23.71  | 25.83  | 24.87  | 23.85  | 25.21  | 24.39  | 24.76  |
| Salinity (PSU <sup>a</sup> )                                   | 30.04   | 31.51  | 31.44  | 31.31  | 30.86  | 31.34  | 30.51  | 31.20  | 31.44  | 31.54  | 30.23  | 30.06  | 30.15  | 30.02  |
| EC25 <sup>b</sup> (mS/cm)                                      | 46.32   | 48.40  | 48.27  | 48.08  | 47.71  | 48.05  | 46.93  | 48.06  | 48.15  | 48.38  | 46.70  | 46.31  | 46.52  | 46.31  |
| Density ( $\sigma_t$ )                                         | 19.63   | 20.89  | 20.74  | 20.61  | 20.88  | 20.45  | 19.87  | 20.86  | 20.41  | 20.77  | 20.08  | 19.55  | 19.86  | 19.66  |
| Turbidity (FTU <sup>c</sup> )                                  | 4.38    | 0.48   | 0.44   | 0.32   | 0.69   | 5.49   | 0.71   | 0.38   | 12.67  | 4.97   | 2.02   | 3.11   | 4.78   | 2.27   |
| Chl- <i>a</i> (ppb)                                            | 2.47    | 1.65   | 1.08   | 0.94   | 2.24   | 2.32   | 1.96   | 1.82   | 2.46   | 1.91   | 1.56   | 2.44   | 1.55   | 2.09   |
| <b>Bottom water</b>                                            |         |        |        |        |        |        |        |        |        |        |        |        |        |        |
| Temperature (°C)                                               | 24.90   | 18.94  | 18.82  | 23.20  | 18.79  | 25.40  | 20.19  | 21.95  | 25.78  | 24.30  | 23.80  | 24.50  | 24.40  | 24.01  |
| Salinity (PSU)                                                 | 30.05   | 31.61  | 31.65  | 31.32  | 31.12  | 31.35  | 31.43  | 31.21  | 31.45  | 31.56  | 30.24  | 30.03  | 30.15  | 30.15  |
| EC25 (mS/cm)                                                   | 46.34   | 49.36  | 49.45  | 48.30  | 48.71  | 48.08  | 48.89  | 48.31  | 48.16  | 48.49  | 46.72  | 46.35  | 46.53  | 46.58  |
| Density ( $\sigma_t$ )                                         | 19.64   | 22.45  | 22.51  | 21.09  | 22.11  | 20.47  | 22.00  | 21.35  | 20.42  | 20.96  | 20.10  | 19.74  | 19.86  | 19.97  |
| Turbidity (FTU)                                                | 5.60    | 6.40   | 75.52  | 9.84   | 5.37   | 31.42  | 12.63  | 3.20   | 20.33  | 23.47  | 7.37   | 11.17  | 10.05  | 6.99   |
| Chl- <i>a</i> (ppb)                                            | 2.22    | 1.30   | 6.12   | 1.63   | 0.92   | 3.91   | 1.64   | 1.15   | 3.10   | 3.00   | 1.89   | 2.23   | 2.17   | 1.78   |
| <b>Sediment</b>                                                |         |        |        |        |        |        |        |        |        |        |        |        |        |        |
| Water content (%)                                              | 2.50    | 3.91   | 23.19  | 13.93  | 16.25  | 32.41  | 26.65  | 16.79  | 5.48   | 23.44  | 19.56  | 1.46   | 19.32  | 7.09   |
| Chl- <i>a</i> (%)                                              | 0.35    | 0.28   | 0.77   | 0.91   | 2.66   | 0.12   | 0.34   | 0.69   | 0.29   | 0.36   | 0.51   | 0.69   | 1.17   | 0.51   |
| Pha- <i>a</i> (%)                                              | 1.35    | 1.22   | 2.65   | 2.73   | 7.24   | 0.78   | 1.36   | 2.23   | 1.19   | 1.55   | 1.99   | 2.31   | 3.47   | 1.99   |
| sulfide <sup>d</sup> ( $\mu\text{g/g}$ )                       | 19.50   | 9.04   | 12.20  | 5.40   | 48.20  | 7.52   | 132.0  | 6.88   | 29.4   | 14.8   | 43.7   | 103.0  | 11.3   | 11.3   |
| OM (organic matter, %)                                         | 1.51    | 2.86   | 4.38   | 1.46   | 3.29   | 5.79   | 4.92   | 2.65   | 3.74   | 4.13   | 2.13   | 1.11   | 3.10   | 3.64   |
| OrgC (organic C, %)                                            | 0.63    | 0.62   | 0.88   | 0.89   | 1.07   | 2.01   | 1.41   | 0.72   | 1.75   | 1.82   | 2.27   | 1.76   | 1.15   | 1.51   |
| OrgN (organic N, %)                                            | 0.07    | 0.05   | 0.10   | 0.10   | 0.07   | 0.24   | 0.13   | 0.02   | 0.16   | 0.08   | 0.22   | 0.09   | 0.14   | 0.07   |
| OrgP (organic P, $\mu\text{mol/g}$ )                           | 1.78    | 2.68   | 2.76   | 2.49   | 5.19   | 6.09   | 5.00   | 2.06   | 5.33   | 5.98   | 4.10   | 2.56   | 4.30   | 2.78   |
| IP (inorganic P, $\mu\text{mol/g}$ )                           | 9.72    | 8.17   | 12.45  | 12.68  | 12.63  | 23.07  | 18.56  | 13.47  | 15.24  | 18.80  | 20.10  | 16.99  | 21.28  | 18.08  |
| TP (total P, $\mu\text{mol/g}$ )                               | 11.50   | 10.85  | 15.21  | 15.17  | 17.82  | 29.16  | 23.56  | 15.53  | 20.57  | 24.78  | 24.20  | 19.55  | 25.58  | 20.86  |
| OrgC/OrgN                                                      | 9.00    | 12.40  | 8.80   | 8.90   | 15.29  | 8.38   | 10.85  | 36.00  | 10.94  | 22.75  | 10.32  | 19.56  | 8.21   | 21.57  |
| Petroleum hydrocarbon <sup>d</sup> ( $\mu\text{g/g}$ )         | 14.2    | 15.1   | 12.3   | 20.3   | 18.2   | 15.7   | 16.8   | 13.3   | 17.2   | 17.2   | 20.9   | 21.2   | 15.5   | 18.6   |
| Hg <sup>d</sup> (ng/g)                                         | 50.0    | 13.0   | 19.0   | 6.0    | 25.0   | 16.0   | 22.0   | 28.0   | 52.0   | 57.0   | 40.0   | 70.0   | 43.0   | 54.0   |
| Cd <sup>d</sup> ( $\mu\text{g/g}$ )                            | 0.22    | 0.19   | 0.14   | 0.12   | 0.12   | 0.13   | 0.18   | 0.09   | 0.16   | 0.14   | 0.13   | 0.12   | 0.10   | 0.12   |
| Pb <sup>d</sup> ( $\mu\text{g/g}$ )                            | 25.6    | 27.0   | 23.0   | 21.4   | 24.0   | 24.8   | 22.9   | 18.0   | 19.0   | 24.2   | 20.8   | 20.7   | 18.6   | 20.2   |
| Cr <sup>d</sup> ( $\mu\text{g/g}$ )                            | 49.5    | 43.4   | 57.3   | 45.9   | 54.4   | 76.3   | 76.2   | 48.8   | 69.2   | 75.3   | 59.2   | 65.1   | 53.6   | 61.7   |
| Zn <sup>d</sup> ( $\mu\text{g/g}$ )                            | 70.0    | 50.6   | 70.4   | 48.5   | 60.7   | 85.7   | 87.7   | 52.6   | 75.0   | 85.3   | 87.7   | 69.4   | 55.9   | 66.6   |
| Cu <sup>d</sup> ( $\mu\text{g/g}$ )                            | 19.5    | 17.2   | 24.0   | 13.8   | 19.4   | 30.6   | 29.6   | 17.6   | 26.9   | 30.3   | 26.7   | 25.8   | 18.7   | 22.5   |
| Co <sup>d</sup> ( $\mu\text{g/g}$ )                            | 9.21    | 5.96   | 9.19   | 6.00   | 7.80   | 12.90  | 12.80  | 7.59   | 11.50  | 14.00  | 8.98   | 11.30  | 8.80   | 9.36   |
| Ni <sup>d</sup> ( $\mu\text{g/g}$ )                            | 23.2    | 19.1   | 26.6   | 18.9   | 22.9   | 34.3   | 35.0   | 20.6   | 30.5   | 35.4   | 22.5   | 28.2   | 22.1   | 26.2   |
| As <sup>d</sup> ( $\mu\text{g/g}$ )                            | 5.33    | 6.13   | 5.18   | 5.05   | 5.98   | 12.40  | 8.43   | 5.58   | 13.80  | 14.70  | 11.50  | 13.60  | 13.90  | 13.30  |
| Fe <sup>d</sup> (mg/g)                                         | 21.7    | 20.0   | 26.1   | 20.4   | 25.8   | 32.7   | 36.6   | 23.8   | 31.7   | 35.6   | 27.0   | 30.5   | 26.5   | 28.6   |
| Mn <sup>d</sup> ( $\mu\text{g/g}$ )                            | 399.0   | 382.0  | 536.0  | 594.0  | 491.0  | 588.0  | 676.0  | 467.0  | 627.0  | 684.0  | 594.0  | 605.0  | 621.0  | 600.0  |
| Sand content (%)                                               | 45.08   | 33.55  | 17.52  | 51.65  | 33.91  | 1.38   | 3.31   | 28.95  | 3.03   | 4.09   | 7.95   | 15.82  | 16.98  | 7.55   |
| Silt content (%)                                               | 40.16   | 50.61  | 61.27  | 36.82  | 46.49  | 64.23  | 65.36  | 59.07  | 71.67  | 69.63  | 77.17  | 69.31  | 69.52  | 75.44  |
| Clay content (%)                                               | 14.76   | 15.84  | 21.21  | 11.53  | 19.60  | 34.39  | 31.33  | 11.98  | 25.30  | 26.28  | 14.88  | 14.87  | 13.50  | 17.01  |
| Median grain size ( $\phi$ )                                   | 5.78    | 5.38   | 4.45   | 6.02   | 4.76   | 2.95   | 3.25   | 5.51   | 3.81   | 3.64   | 4.94   | 5.00   | 5.25   | 4.80   |
| Mean grain size ( $\phi$ )                                     | 5.00    | 5.26   | 5.91   | 4.60   | 5.47   | 6.91   | 6.73   | 5.11   | 6.33   | 6.40   | 5.65   | 5.58   | 5.38   | 5.78   |
| Sorting coefficient                                            | 1.91    | 1.90   | 1.90   | 1.83   | 2.02   | 1.61   | 1.67   | 1.73   | 1.75   | 1.75   | 1.67   | 1.75   | 1.72   | 1.74   |
| Kurtosis                                                       | 2.58    | 2.32   | 1.82   | 3.39   | 1.91   | 2.12   | 2.04   | 2.94   | 1.88   | 1.91   | 2.50   | 2.32   | 2.68   | 2.18   |
| Skewness                                                       | 0.97    | 0.80   | 0.35   | 1.28   | 0.51   | -0.15  | -0.01  | 1.04   | 0.27   | 0.17   | 0.80   | 0.71   | 0.91   | 0.64   |
| <b>Sediment pore-water</b>                                     |         |        |        |        |        |        |        |        |        |        |        |        |        |        |
| Salinity (‰)                                                   | 33.3    | 34.0   | 33.8   | 34.7   | 34.1   | 33.9   | 33.4   | 33.6   | 33.3   | 34.1   | 33.8   | 33.6   | 32.8   | 33.6   |
| pH                                                             | 7.71    | 7.65   | 7.87   | 7.95   | 8.91   | 7.68   | 7.72   | 7.65   | 7.41   | 7.65   | 7.74   | 7.84   | 7.66   | 7.49   |
| Conductivity (mS/cm)                                           | 42.6    | 44.2   | 43.7   | 42.0   | 43.9   | 43.6   | 42.6   | 42.5   | 43.6   | 43.9   | 42.0   | 41.7   | 41.3   | 42.6   |
| <i>Eh</i> (mv)                                                 | -38.1   | -34.3  | -47.2  | -51.6  | -106.2 | -36.2  | -38.6  | -34.6  | -21.6  | -34.6  | -40.1  | -45.8  | -34.7  | -25.9  |
| DO ( $\mu\text{M}$ )                                           | 0.21    | 0.15   | 0.12   | 0.17   | 0.12   | 0.18   | 0.10   | 0.17   | 0.20   | 0.09   | 0.17   | 0.16   | 0.18   | 0.15   |
| NO <sub>3</sub> <sup>-</sup> ( $\mu\text{M}$ )                 | 2.66    | 1.13   | 3.92   | 2.48   | 4.90   | 0.07   | 4.42   | 1.30   | 0.29   | 6.16   | 6.19   | 7.34   | 12.16  | 20.17  |
| NO <sub>2</sub> <sup>-</sup> ( $\mu\text{M}$ )                 | 1.18    | 0.86   | 0.64   | 1.12   | 0.93   | 1.08   | 0.82   | 0.94   | 0.86   | 0.91   | 1.08   | 1.27   | 1.46   | 1.55   |
| NO <sub>x</sub> <sup>-e</sup> ( $\mu\text{M}$ )                | 3.84    | 1.99   | 4.56   | 3.6    | 5.83   | 1.15   | 5.24   | 2.24   | 1.15   | 7.07   | 7.27   | 8.61   | 13.62  | 21.72  |
| NH <sub>4</sub> <sup>+</sup> ( $\mu\text{M}$ )                 | 257.64  | 109.08 | 36.76  | 57.84  | 151.36 | 78.60  | 59.40  | 52.82  | 132.08 | 124.82 | 68.48  | 134.94 | 88.22  | 63.24  |
| DIN <sup>f</sup> ( $\mu\text{M}$ )                             | 261.48  | 111.07 | 41.32  | 61.44  | 157.19 | 79.75  | 64.64  | 55.06  | 133.23 | 131.89 | 75.75  | 143.55 | 101.84 | 84.96  |
| NO <sub>2</sub> <sup>-</sup> /NH <sub>4</sub> <sup>+</sup> (%) | 0.46    | 0.79   | 1.74   | 1.94   | 0.61   | 1.37   | 1.38   | 1.78   | 0.65   | 0.73   | 1.58   | 0.94   | 1.65   | 2.45   |
| NO <sub>x</sub> <sup>-</sup> /NH <sub>4</sub> <sup>+</sup> (%) | 1.49    | 1.82   | 12.40  | 6.22   | 3.85   | 1.46   | 8.82   | 4.24   | 0.87   | 5.66   | 10.62  | 6.38   | 15.44  | 34.35  |
| PO <sub>4</sub> <sup>3-</sup> ( $\mu\text{M}$ )                | 2.80    | 1.92   | 1.62   | 4.67   | 2.31   | 0.92   | 1.26   | 3.31   | 0.51   | 1.75   | 2.86   | 3.46   | 1.80   | 1.58   |
| N/P (DIN/PO <sub>4</sub> <sup>3-</sup> )                       | 93.39   | 57.85  | 25.51  | 13.16  | 68.05  | 86.68  | 51.30  | 16.63  | 261.24 | 75.37  | 26.49  | 41.49  | 56.58  | 53.77  |
| SiO <sub>3</sub> <sup>2-</sup> ( $\mu\text{M}$ )               | 113.43  | 94.44  | 87.02  | 131.65 | 153.77 | 71.04  | 79.75  | 137.47 | 101.61 | 114.19 | 99.05  | 189.21 | 105.46 | 130.08 |
| SO <sub>4</sub> <sup>2-d</sup> (mg/g)                          | 1.11    | 1.13   | 1.35   | 1.27   | 1.20   | 1.92   | 1.85   | 1.03   | 1.24   | 1.68   | 0.98   | 1.02   | 1.01   | 1.35   |

<sup>a</sup> PSU: Practical Salinity Unit;<sup>b</sup> EC25: Electrical Conductivity calibrated at water temperature of 25 °C;<sup>c</sup> FTU: Formazin Turbidity Unit;<sup>d</sup> These environmental parameters were determined and provided by the Qingdao Branch of the Pony Testing International Group (Qingdao, China);<sup>e</sup> NO<sub>x</sub><sup>-</sup> was calculated as the sum of NO<sub>2</sub><sup>-</sup> and NO<sub>3</sub><sup>-</sup>;<sup>f</sup> DIN (the total dissolved inorganic N concentration) was calculated as the sum of NH<sub>4</sub><sup>+</sup>, NO<sub>2</sub><sup>-</sup> and NO<sub>3</sub><sup>-</sup>.
