# Supplementary material for: Molecular Detection of Candidatus Scalindua pacifica and Environmental Responses of Sediment Anammox Bacterial Community in the Bohai Sea, China
Source: PubMed Central journal article supplement (PMC3620062; doi:10.1371/journal.pone.0061330), 2013-04-08
Supplement: pone.0061330.s010.pdf [file pone.0061330.s010.pdf]

**Table S2.** Correlation analyses of biodiversity and abundance of key microbial groups with Bohai Sea environmental factors.

| Environmental factor         | Pearson correlation coefficient<br>( <i>p</i> value)* |                                 |                                 |                                |                                |                                      |                                 |                                 |                                 |                         |                                 |                                 |                                |
|------------------------------|-------------------------------------------------------|---------------------------------|---------------------------------|--------------------------------|--------------------------------|--------------------------------------|---------------------------------|---------------------------------|---------------------------------|-------------------------|---------------------------------|---------------------------------|--------------------------------|
|                              | Gene biodiversity                                     |                                 |                                 |                                |                                | Gene abundance                       |                                 |                                 |                                 |                         |                                 |                                 |                                |
|                              | <i>Scalindua</i> 16S rRNA gene biodiversity           |                                 |                                 |                                |                                | Anammox <i>hzo</i> gene biodiversity |                                 |                                 |                                 |                         | Bacterial 16S rRNA              | <i>Scalindua</i> 16S rRNA       | Anammox <i>hzo</i>             |
|                              | <i>H</i>                                              | <i>J</i>                        | 1/ <i>D</i>                     | <i>S</i> <sub>Chao1</sub>      | <i>S</i> <sub>ACE</sub>        | <i>H</i>                             | <i>J</i>                        | 1/ <i>D</i>                     | <i>S</i> <sub>Chao1</sub>       | <i>S</i> <sub>ACE</sub> |                                 |                                 |                                |
| <b>Water depth</b>           | -0.504<br>(0.066)                                     | -0.274<br>(0.344)               | -0.397<br>(0.160)               | -0.320<br>(0.264)              | -0.229<br>(0.431)              | 0.331<br>(0.248)                     | 0.338<br>(0.237)                | 0.283<br>(0.327)                | <b>0.652</b><br><b>(0.012)</b>  | 0.265<br>(0.360)        | -0.229<br>(0.431)               | -0.383<br>(0.177)               | -0.223<br>(0.444)              |
| <b>Surface water</b>         |                                                       |                                 |                                 |                                |                                |                                      |                                 |                                 |                                 |                         |                                 |                                 |                                |
| Temperature                  | 0.027<br>(0.928)                                      | -0.290<br>(0.315)               | -0.079<br>(0.788)               | 0.255<br>(0.379)               | 0.239<br>(0.411)               | -0.238<br>(0.413)                    | -0.226<br>(0.437)               | -0.107<br>(0.715)               | <b>-0.630</b><br><b>(0.016)</b> | -0.279<br>(0.335)       | 0.027<br>(0.926)                | <b>0.761</b><br><b>(0.002)</b>  | <b>0.649</b><br><b>(0.012)</b> |
| Salinity                     | <b>-0.638</b><br><b>(0.014)</b>                       | <b>-0.597</b><br><b>(0.024)</b> | <b>-0.588</b><br><b>(0.027)</b> | -0.291<br>(0.312)              | -0.119<br>(0.686)              | -0.065<br>(0.825)                    | 0.023<br>(0.939)                | -0.062<br>(0.833)               | -0.081<br>(0.783)               | -0.229<br>(0.431)       | <b>-0.579</b><br><b>(0.029)</b> | 0.006<br>(0.985)                | 0.108<br>(0.714)               |
| EC25                         | <b>-0.646</b><br><b>(0.013)</b>                       | <b>-0.571</b><br><b>(0.033)</b> | <b>-0.584</b><br><b>(0.028)</b> | -0.319<br>(0.266)              | -0.144<br>(0.623)              | -0.041<br>(0.890)                    | 0.046<br>(0.876)                | -0.051<br>(0.862)               | -0.012<br>(0.969)               | -0.199<br>(0.495)       | <b>-0.582</b><br><b>(0.029)</b> | -0.074<br>(0.802)               | 0.039<br>(0.894)               |
| Density                      | <b>-0.603</b><br><b>(0.022)</b>                       | -0.421<br>(0.133)               | -0.509<br>(0.063)               | -0.385<br>(0.174)              | -0.219<br>(0.452)              | 0.048<br>(0.870)                     | 0.125<br>(0.670)                | -0.008<br>(0.978)               | 0.210<br>(0.471)                | -0.087<br>(0.767)       | <b>-0.550</b><br><b>(0.041)</b> | -0.344<br>(0.228)               | -0.198<br>(0.497)              |
| Turbidity                    | -0.044<br>(0.881)                                     | -0.223<br>(0.444)               | -0.005<br>(0.987)               | 0.073<br>(0.805)               | 0.107<br>(0.717)               | <b>-0.550</b><br><b>(0.041)</b>      | <b>-0.702</b><br><b>(0.005)</b> | -0.508<br>(0.064)               | -0.198<br>(0.498)               | -0.042<br>(0.886)       | 0.180<br>(0.538)                | <b>0.633</b><br><b>(0.015)</b>  | <b>0.548</b><br><b>(0.043)</b> |
| Chl- <i>a</i>                | -0.198<br>(0.498)                                     | -0.255<br>(0.379)               | -0.249<br>(0.391)               | 0.155<br>(0.597)               | 0.153<br>(0.602)               | -0.301<br>(0.296)                    | -0.446<br>(0.110)               | -0.244<br>(0.400)               | 0.173<br>(0.555)                | 0.100<br>(0.734)        | <b>0.605</b><br><b>(0.022)</b>  | 0.512<br>(0.061)                | 0.280<br>(0.332)               |
| <b>Bottom water</b>          |                                                       |                                 |                                 |                                |                                |                                      |                                 |                                 |                                 |                         |                                 |                                 |                                |
| Temperature                  | 0.423<br>(0.131)                                      | 0.219<br>(0.451)                | 0.334<br>(0.243)                | 0.270<br>(0.350)               | 0.244<br>(0.400)               | <b>-0.596</b><br><b>(0.024)</b>      | <b>-0.590</b><br><b>(0.027)</b> | <b>-0.584</b><br><b>(0.028)</b> | <b>-0.588</b><br><b>(0.027)</b> | -0.391<br>(0.167)       | 0.282<br>(0.328)                | 0.362<br>(0.204)                | 0.160<br>(0.586)               |
| Salinity                     | <b>-0.664</b><br><b>(0.010)</b>                       | <b>-0.667</b><br><b>(0.009)</b> | <b>-0.636</b><br><b>(0.014)</b> | -0.244<br>(0.401)              | -0.087<br>(0.768)              | 0.071<br>(0.808)                     | 0.149<br>(0.612)                | 0.101<br>(0.730)                | 0.062<br>(0.832)                | -0.071<br>(0.810)       | -0.503<br>(0.067)               | 0.069<br>(0.814)                | 0.141<br>(0.630)               |
| EC25                         | <b>-0.679</b><br><b>(0.008)</b>                       | <b>-0.619</b><br><b>(0.018)</b> | <b>-0.625</b><br><b>(0.017)</b> | -0.281<br>(0.330)              | -0.143<br>(0.625)              | 0.253<br>(0.384)                     | 0.308<br>(0.283)                | 0.273<br>(0.346)                | 0.248<br>(0.393)                | 0.074<br>(0.801)        | -0.493<br>(0.073)               | -0.055<br>(0.851)               | 0.072<br>(0.808)               |
| Density                      | <b>-0.598</b><br><b>(0.024)</b>                       | -0.461<br>(0.097)               | -0.527<br>(0.053)               | -0.300<br>(0.297)              | -0.209<br>(0.472)              | 0.442<br>(0.113)                     | 0.479<br>(0.083)                | 0.448<br>(0.108)                | 0.423<br>(0.132)                | 0.227<br>(0.435)        | -0.434<br>(0.121)               | -0.220<br>(0.450)               | -0.050<br>(0.865)              |
| <b>Sediment</b>              |                                                       |                                 |                                 |                                |                                |                                      |                                 |                                 |                                 |                         |                                 |                                 |                                |
| Chl- <i>a</i>                | 0.086<br>(0.771)                                      | 0.129<br>(0.660)                | 0.153<br>(0.601)                | -0.134<br>(0.647)              | -0.043<br>(0.883)              | -0.059<br>(0.840)                    | -0.039<br>(0.894)               | -0.170<br>(0.560)               | <b>0.721</b><br><b>(0.004)</b>  | 0.157<br>(0.592)        | 0.288<br>(0.319)                | -0.452<br>(0.105)               | -0.411<br>(0.144)              |
| Pha- <i>a</i>                | 0.095<br>(0.748)                                      | 0.142<br>(0.629)                | 0.160<br>(0.586)                | -0.118<br>(0.687)              | -0.036<br>(0.903)              | -0.064<br>(0.828)                    | -0.044<br>(0.882)               | -0.173<br>(0.554)               | <b>0.714</b><br><b>(0.004)</b>  | 0.157<br>(0.592)        | 0.269<br>(0.353)                | -0.467<br>(0.092)               | -0.419<br>(0.136)              |
| OM                           | -0.280<br>(0.332)                                     | <b>-0.600</b><br><b>(0.023)</b> | -0.272<br>(0.346)               | 0.410<br>(0.145)               | <b>0.536</b><br><b>(0.048)</b> | -0.116<br>(0.693)                    | -0.218<br>(0.455)               | -0.064<br>(0.828)               | 0.060<br>(0.838)                | 0.004<br>(0.989)        | 0.003<br>(0.992)                | 0.392<br>(0.166)                | 0.434<br>(0.121)               |
| OrgC                         | 0.155<br>(0.597)                                      | 0.181<br>(0.536)                | 0.087<br>(0.766)                | 0.170<br>(0.562)               | 0.191<br>(0.512)               | <b>-0.575</b><br><b>(0.031)</b>      | <b>-0.586</b><br><b>(0.028)</b> | <b>-0.574</b><br><b>(0.032)</b> | -0.201<br>(0.490)               | 0.002<br>(0.994)        | -0.076<br>(0.795)               | 0.394<br>(0.163)                | 0.202<br>(0.488)               |
| IP                           | 0.511<br>(0.062)                                      | 0.301<br>(0.295)                | 0.462<br>(0.096)                | 0.397<br>(0.160)               | 0.428<br>(0.127)               | -0.513<br>(0.061)                    | <b>-0.532</b><br><b>(0.050)</b> | <b>-0.542</b><br><b>(0.045)</b> | -0.149<br>(0.611)               | -0.062<br>(0.833)       | 0.221<br>(0.447)                | 0.366<br>(0.199)                | 0.202<br>(0.490)               |
| TP                           | 0.379<br>(0.181)                                      | 0.165<br>(0.574)                | 0.343<br>(0.229)                | 0.345<br>(0.227)               | 0.417<br>(0.138)               | -0.526<br>(0.053)                    | <b>-0.561</b><br><b>(0.037)</b> | <b>-0.542</b><br><b>(0.045)</b> | -0.149<br>(0.611)               | -0.062<br>(0.833)       | 0.196<br>(0.502)                | 0.388<br>(0.170)                | 0.225<br>(0.440)               |
| Hg                           | 0.354<br>(0.214)                                      | 0.301<br>(0.295)                | 0.270<br>(0.351)                | 0.133<br>(0.651)               | -0.042<br>(0.888)              | -0.503<br>(0.067)                    | <b>-0.541</b><br><b>(0.046)</b> | -0.426<br>(0.129)               | -0.237<br>(0.414)               | -0.124<br>(0.673)       | 0.409<br>(0.147)                | 0.266<br>(0.359)                | 0.100<br>(0.734)               |
| Cd                           | -0.462<br>(0.096)                                     | -0.468<br>(0.092)               | -0.472<br>(0.088)               | -0.124<br>(0.672)              | -0.145<br>(0.621)              | <b>0.579</b><br><b>(0.030)</b>       | 0.461<br>(0.097)                | <b>0.661</b><br><b>(0.010)</b>  | 0.143<br>(0.626)                | 0.419<br>(0.136)        | -0.069<br>(0.814)               | 0.158<br>(0.588)                | 0.183<br>(0.531)               |
| Pb                           | -0.529<br>(0.052)                                     | <b>-0.540</b><br><b>(0.046)</b> | <b>-0.554</b><br><b>(0.040)</b> | -0.061<br>(0.835)              | 0.071<br>(0.809)               | <b>0.555</b><br><b>(0.039)</b>       | <b>0.534</b><br><b>(0.049)</b>  | <b>0.563</b><br><b>(0.036)</b>  | 0.287<br>(0.320)                | 0.213<br>(0.464)        | -0.162<br>(0.580)               | -0.167<br>(0.569)               | -0.095<br>(0.747)              |
| Cr                           | -0.038<br>(0.898)                                     | -0.282<br>(0.329)               | -0.165<br>(0.573)               | 0.292<br>(0.310)               | 0.342<br>(0.231)               | -0.490<br>(0.075)                    | -0.471<br>(0.089)               | -0.401<br>(0.155)               | -0.196<br>(0.503)               | -0.113<br>(0.702)       | 0.159<br>(0.587)                | <b>0.617</b><br><b>(0.019)</b>  | 0.370<br>(0.193)               |
| Cu                           | -0.156<br>(0.593)                                     | -0.247<br>(0.395)               | -0.245<br>(0.399)               | 0.153<br>(0.601)               | 0.189<br>(0.518)               | -0.331<br>(0.247)                    | -0.342<br>(0.231)               | -0.249<br>(0.390)               | -0.174<br>(0.551)               | 0.034<br>(0.907)        | -0.023<br>(0.937)               | <b>0.551</b><br><b>(0.041)</b>  | 0.345<br>(0.227)               |
| Co                           | -0.017<br>(0.954)                                     | -0.280<br>(0.333)               | -0.151<br>(0.606)               | 0.225<br>(0.440)               | 0.258<br>(0.373)               | -0.440<br>(0.116)                    | -0.407<br>(0.148)               | -0.337<br>(0.239)               | -0.271<br>(0.348)               | -0.163<br>(0.577)       | 0.238<br>(0.413)                | <b>0.594</b><br><b>(0.025)</b>  | 0.320<br>(0.265)               |
| Ni                           | -0.137<br>(0.640)                                     | -0.440<br>(0.116)               | -0.278<br>(0.337)               | 0.279<br>(0.334)               | 0.337<br>(0.239)               | -0.395<br>(0.162)                    | -0.360<br>(0.207)               | -0.282<br>(0.329)               | -0.216<br>(0.458)               | -0.164<br>(0.575)       | 0.173<br>(0.555)                | <b>0.611</b><br><b>(0.020)</b>  | 0.377<br>(0.184)               |
| As                           | 0.440<br>(0.116)                                      | 0.264<br>(0.362)                | 0.404<br>(0.152)                | 0.342<br>(0.231)               | 0.290<br>(0.315)               | <b>-0.684</b><br><b>(0.007)</b>      | <b>-0.785</b><br><b>(0.001)</b> | <b>-0.646</b><br><b>(0.013)</b> | -0.318<br>(0.268)               | -0.126<br>(0.668)       | 0.227<br>(0.434)                | 0.521<br>(0.056)                | 0.416<br>(0.139)               |
| Fe                           | 0.040<br>(0.892)                                      | -0.189<br>(0.517)               | -0.077<br>(0.793)               | 0.252<br>(0.385)               | 0.267<br>(0.356)               | -0.494<br>(0.073)                    | -0.479<br>(0.083)               | -0.400<br>(0.156)               | -0.144<br>(0.624)               | -0.071<br>(0.810)       | 0.213<br>(0.465)                | <b>0.589</b><br><b>(0.027)</b>  | 0.341<br>(0.233)               |
| Mn                           | 0.448<br>(0.108)                                      | 0.172<br>(0.556)                | 0.323<br>(0.261)                | 0.278<br>(0.336)               | 0.268<br>(0.355)               | <b>-0.633</b><br><b>(0.015)</b>      | -0.526<br>(0.053)               | <b>-0.586</b><br><b>(0.028)</b> | -0.334<br>(0.243)               | -0.245<br>(0.399)       | 0.076<br>(0.797)                | 0.386<br>(0.173)                | 0.193<br>(0.508)               |
| Sand content                 | -0.058<br>(0.845)                                     | 0.056<br>(0.850)                | -0.040<br>(0.891)               | -0.314<br>(0.274)              | -0.285<br>(0.322)              | 0.442<br>(0.113)                     | <b>0.556</b><br><b>(0.039)</b>  | 0.368<br>(0.196)                | 0.189<br>(0.519)                | -0.065<br>(0.826)       | -0.008<br>(0.979)               | <b>-0.602</b><br><b>(0.023)</b> | -0.519<br>(0.057)              |
| Silt content                 | 0.289<br>(0.316)                                      | 0.292<br>(0.312)                | 0.301<br>(0.296)                | 0.267<br>(0.357)               | 0.145<br>(0.620)               | -0.470<br>(0.090)                    | <b>-0.594</b><br><b>(0.025)</b> | -0.415<br>(0.140)               | -0.260<br>(0.370)               | 0.064<br>(0.828)        | -0.014<br>(0.961)               | 0.458<br>(0.100)                | 0.424<br>(0.130)               |
| Clay content                 | -0.383<br>(0.177)                                     | <b>-0.647</b><br><b>(0.012)</b> | -0.443<br>(0.113)               | 0.243<br>(0.402)               | 0.394<br>(0.163)               | -0.173<br>(0.553)                    | -0.215<br>(0.459)               | -0.103<br>(0.727)               | 0.031<br>(0.915)                | 0.034<br>(0.907)        | 0.043<br>(0.883)                | <b>0.562</b><br><b>(0.037)</b>  | 0.432<br>(0.123)               |
| Median grain size            | 0.280<br>(0.332)                                      | 0.499<br>(0.069)                | 0.331<br>(0.247)                | -0.247<br>(0.395)              | -0.360<br>(0.207)              | 0.312<br>(0.278)                     | 0.362<br>(0.204)                | 0.239<br>(0.410)                | 0.011<br>(0.970)                | -0.031<br>(0.917)       | -0.028<br>(0.923)               | <b>-0.596</b><br><b>(0.025)</b> | -0.459<br>(0.099)              |
| Mean grain size              | -0.232<br>(0.424)                                     | -0.442<br>(0.114)               | -0.279<br>(0.334)               | 0.285<br>(0.323)               | 0.364<br>(0.200)               | -0.293<br>(0.309)                    | -0.370<br>(0.193)               | -0.210<br>(0.470)               | -0.059<br>(0.842)               | 0.059<br>(0.840)        | 0.034<br>(0.907)                | <b>0.634</b><br><b>(0.015)</b>  | 0.511<br>(0.062)               |
| Sorting coefficient          | -0.366<br>(0.198)                                     | -0.289<br>(0.316)               | -0.310<br>(0.280)               | -0.259<br>(0.370)              | -0.221<br>(0.448)              | 0.372<br>(0.191)                     | 0.375<br>(0.186)                | 0.343<br>(0.230)                | <b>0.556</b><br><b>(0.039)</b>  | 0.164<br>(0.575)        | -0.025<br>(0.934)               | -0.496<br>(0.071)               | -0.311<br>(0.280)              |
| Kurtosis                     | 0.441<br>(0.115)                                      | <b>0.544</b><br><b>(0.045)</b>  | 0.428<br>(0.127)                | -0.161<br>(0.583)              | -0.200<br>(0.492)              | 0.135<br>(0.646)                     | 0.284<br>(0.325)                | 0.049<br>(0.867)                | -0.325<br>(0.258)               | -0.266<br>(0.358)       | -0.031<br>(0.916)               | -0.403<br>(0.153)               | -0.433<br>(0.122)              |
| Skewness                     | 0.371<br>(0.191)                                      | <b>0.591</b><br><b>(0.026)</b>  | 0.414<br>(0.141)                | -0.244<br>(0.400)              | -0.364<br>(0.201)              | 0.212<br>(0.466)                     | 0.280<br>(0.333)                | 0.134<br>(0.649)                | -0.083<br>(0.779)               | -0.079<br>(0.787)       | -0.044<br>(0.882)               | <b>-0.567</b><br><b>(0.034)</b> | -0.467<br>(0.092)              |
| <b>Sediment pore-water</b>   |                                                       |                                 |                                 |                                |                                |                                      |                                 |                                 |                                 |                         |                                 |                                 |                                |
| Salinity                     | -0.335<br>(0.241)                                     | -0.213<br>(0.465)               | -0.446<br>(0.110)               | -0.136<br>(0.643)              | -0.005<br>(0.987)              | -0.020<br>(0.946)                    | 0.236<br>(0.417)                | -0.071<br>(0.809)               | -0.025<br>(0.932)               | -0.323<br>(0.260)       | <b>-0.540</b><br><b>(0.046)</b> | -0.477<br>(0.085)               | -0.469<br>(0.091)              |
| pH                           | -0.181<br>(0.535)                                     | -0.066<br>(0.822)               | -0.162<br>(0.579)               | -0.240<br>(0.408)              | -0.086<br>(0.771)              | 0.107<br>(0.716)                     | 0.192<br>(0.511)                | 0.001<br>(0.997)                | <b>0.748</b><br><b>(0.002)</b>  | 0.191<br>(0.514)        | 0.143<br>(0.625)                | -0.465<br>(0.094)               | -0.491<br>(0.075)              |
| Conductivity                 | <b>-0.829</b><br><b>(0.000)</b>                       | <b>-0.828</b><br><b>(0.000)</b> | <b>-0.791</b><br><b>(0.001)</b> | -0.047<br>(0.874)              | 0.089<br>(0.763)               | 0.089<br>(0.762)                     | 0.014<br>(0.963)                | 0.128<br>(0.664)                | 0.304<br>(0.290)                | 0.088<br>(0.765)        | -0.321<br>(0.263)               | 0.029<br>(0.922)                | 0.167<br>(0.568)               |
| <i>Eh</i>                    | 0.184<br>(0.528)                                      | 0.067<br>(0.820)                | 0.167<br>(0.569)                | 0.240<br>(0.409)               | 0.087<br>(0.768)               | -0.101<br>(0.732)                    | -0.186<br>(0.524)               | 0.005<br>(0.988)                | <b>-0.747</b><br><b>(0.002)</b> | -0.191<br>(0.514)       | -0.142<br>(0.627)               | 0.462<br>(0.096)                | 0.490<br>(0.075)               |
| NO <sub>3</sub> <sup>-</sup> | <b>0.723</b><br><b>(0.003)</b>                        | 0.445<br>(0.111)                | <b>0.643</b><br><b>(0.013)</b>  | <b>0.685</b><br><b>(0.007)</b> | 0.494<br>(0.073)               | -0.274<br>(0.344)                    | -0.346<br>(0.226)               | -0.244<br>(0.402)               | -0.087<br>(0.768)               | -0.125<br>(0.670)       | 0.396<br>(0.161)                | -0.102<br>(0.728)               | -0.013<br>(0.965)              |
| NO <sub>2</sub> <sup>-</sup> | <b>0.813</b><br><b>(0.000)</b>                        | <b>0.575</b><br><b>(0.031)</b>  | <b>0.751</b><br><b>(0.002)</b>  | <b>0.567</b><br><b>(0.034)</b> | 0.452<br>(0.105)               | -0.299<br>(0.299)                    | -0.368<br>(0.196)               | -0.329<br>(0.251)               | -0.236<br>(0.417)               | -0.228<br>(0.433)       | <b>0.565</b><br><b>(0.035)</b>  | -0.003<br>(0.993)               | -0.022<br>(0.940)              |
| NO <sub>x</sub> <sup>-</sup> | <b>0.736</b><br><b>(0.003)</b>                        | 0.456<br>(0.101)                | <b>0.656</b><br><b>(0.011)</b>  | <b>0.688</b><br><b>(0.007)</b> | 0.498<br>(0.070)               | -0.278<br>(0.336)                    |                                 |                                 |                                 |                         |                                 |                                 |                                |
