# Supplementary material for: Molecular Detection of Candidatus Scalindua pacifica and Environmental Responses of Sediment Anammox Bacterial Community in the Bohai Sea, China
Source: PubMed Central journal article supplement (PMC3620062; doi:10.1371/journal.pone.0061330), 2013-04-08
Supplement: pone.0061330.s011.pdf [file pone.0061330.s011.pdf]

**Table S3.** Efficiency and sensitivity of individual qPCR standard curve determined via linearized plasmid DNA.

| Target gene                  | Primer set             | Efficiency     |        |                                  | Sensitivity<br>(copy number/ $\mu$ l plasmid DNA) |                         |
|------------------------------|------------------------|----------------|--------|----------------------------------|---------------------------------------------------|-------------------------|
|                              |                        | R <sup>2</sup> | Slope  | Linearity range                  | Expected value                                    | Obtained value          |
| Bacterial 16S RNA            | 341F,<br>518R          | 0.991          | -3.365 | 10 <sup>3</sup> -10 <sup>9</sup> | 1.870 x 10 <sup>6</sup>                           | 1.837 x 10 <sup>6</sup> |
| <i>Scalindua</i> 16S rRNA    | Brod541F,<br>Brod1260R | 0.998          | -3.367 | 10 <sup>1</sup> -10 <sup>6</sup> | 2.935 x 10 <sup>6</sup>                           | 2.877 x 10 <sup>6</sup> |
| Anammox bacterial <i>hzo</i> | HzoF1,<br>HzoR1        | 0.996          | -3.266 | 10 <sup>1</sup> -10 <sup>6</sup> | 3.289 x 10 <sup>6</sup>                           | 3.367 x 10 <sup>6</sup> |
